# Supplementary material
Source: publisher site journal article supplement (https://static.cambridge.org/content/id/urn:cambridge.org:id:article:S2040174419000850/resource/name/S2040174419000850supp001.docx)
Supplement: Supplementary file 1 [file S2040174419000850supp001.docx]

| Supplementary table 1 Results of studies not included in the meta analyses | |  |  |
| --- | --- | --- | --- |
|  |  |  |  |
| Study | **Results in GDM group** | **Results in control group** | **P** |
| SBP (mmHg) |  |  |  |
| Krishnaveni 2010☨ | 5 years (Girls): Mean (99.0) SD (8.2) | 5 years (Girls): Mean (95.0) SD (8.1) | 0.08 |
|  | 5 years (Boys): Mean (95.4) SD (9.4) | 5 years (Boys): 97.2 SD (8.9) | 0.1 |
|  | 9.5 years (Girls): Mean (103.8) SD (8.0) | 9.5 years (Girls): Girls: Mean (99.4) SD (8.5) | 0.02 |
|  | 9.5 years (Boys): Mean (106) SD (12) | 9.5 years (Boys): Mean (101.9) SD (8.9) | 0.2 |
| Lee 2007 | Mean (93.3) SD (9.3) | IGT: Mean (92.3) SD (8.7) | NS |
| Page 2013⁘ Ω | Mean (105.0) SEM (10.0) | Mean (100.0) SEM (10.0) | 0.15 |
| Tam 2008☨ | Mean (94) SD (9.5) | Mean (88) SD (8.9) | <0.001 |
| Tam 2017Ω | Mean (104) SD (8.7) | Mean (102) SD (8.9) | 0.01 |
| Tsadok 2011 Ω | Mean (121.56) SD (12.30) | Mean (119.84) SD (12.06) | <0.05 |
| Vaarasmaki 2009 | Median 117 IQR (111–125) | Median 115 IQR (106–123) | NS |
| DBP (mmHg) |  |  |  |
| Krishnaveni 2010☨ | Girls: Mean (59.8) SD (4.8) | Girls: Mean (57.9) SD (6.6) | 0.09 |
|  | Boys: Mean (60.3) SD (7.6) | Boys: Mean (58.6) SD (6.9) | 0.4 |
| Lee 2007 | Mean (59.6) SD (8.5) | IGT: Mean (59.0) SD (7.5) | NS |
| Page 2013⁘ Ω | Mean (60) SEM (6) | Mean (60) SEM (9) | 0.62 |
| Tam 2008☨ | Mean (62) SD (6.3) | Mean (57) SD (6.0) | <0.001 |
| Tam 2017 Ω | Mean (63) SD (8.1) | Mean (62) SD (7.9) | 0.06 |
| Tsadok 2011 Ω | Mean (75.12) SD (7.44) | Mean (73.47) SD (8.30) | <0.05 |
| Vaarasmaki 2009 | Median (68) IQR (65-73) | 67 (62-72) | NS |
| BMI (kg/m2) |  |  |  |
| Baptise-Roberts 2012# | Age 3: Mean (15.5) SD (1.65) | Age 3: Mean (15.4) SD (3.0) | 0.721 |
|  | Age 4 Mean (15.67) SD (1.91) | Age 4: Mean (15.36) SD (3.54) | 0.31 |
|  | Age 7: Mean (16.35) SD (2.57) | Age 7: Mean (15.64) SD (1.99) | <0.001 |
| Krishnaveni 2005 * | 1 year: Mean (15.6) SD (1.7) | 1 year: Mean (15.7) SD (1.4) | 0.9 |
|  | 5 years: (14.0) SD (1.2) | 5 years: Mean (13.6) SD (1.2) | 0.03 |
| Krishnaveni 2010 * | Girls: Median (16.4) IQR (14.8-17.8) | Girls: 14.3 (13.13-15.4) | <0.001 |
|  | Boys: Median (15.2) IQR (13.8-16.6) | Boys: Median (14.2) IQR (13.4-15.4) | 0.07 |
| Lee 2007 | Mean (16.1) SD (1.9) | IGT: Mean (16.1) SD (1.7) | NS |
| Nehring 2013 Ω | Mean (16.1) 95% CI (15.8-16.4) | Mean (15.5) 95% CI (15.5-15.5) | NS |
| Nielsen Ω | Mean (26.2) SD (5.6) | Mean (23.3) SD (4) | NR |
| Page 2012⁘ Ω | Mean (20.8) SD (1.3) | Mean (16.1) SD (1.4) | 0.004 |
| Pirokla 2010 | Normal weight: Mean (24.3) 95% CI (23.4-25.1) | Control: Mean (23.7) 95% CI (23.6-23.8) | NR |
|  | Overweight: Mean (26.7) 95% CI (25.3-28.1) |  |  |
| Silverman 1998# | Mean (26.0) SD (5.5) | Mean (20.9) SD (3.4) | <0.001 |
| Tam 2008☨ | Mean (16.2) SD (3.1) | Mean (16.2) SD (3.0) | 0.86 |
| Tam 2017 Ω | Mean (15.3) SD (2.1) | Mean (15.0) SD (2.3) | 0.04 |
| Tsadok 2011 Ω | Mean (22.47) SD (3.86) | Mean (21.18) SD (3.11) | <0.05 |
| Vaarasmaki 2009 | Median (20.8) IQR (19.4-23.8) | Mean (20.2) (18.8-22.1) | NS |
| Vohr 1995 | AGA: Mean (12.5) SD (0.9) | AGA: Mean (12.6) SD (0.9) | NS |
|  | LGA: Mean (14.1) SD (1.2) | LGA: Mean (14.2) SD (1.0) | NS |
| Vohr 1999 | AGA: Mean (12.8) SD (1) | AGA: Mean (13.0) SD (1) | NS |
|  | LGA: Mean (14.7) SD (1) | LGA: Mean (14.8) SD (1) | NS |
| BMI percentiles (Centiles highlighted next to author name) | |  |  |
| Boney 2005 (>85th) | LGA: 13/39 (33%) | LGA: 11/41 (27%) | NS |
|  | AGA: 7/49 (14%) | AGA: 9/41 (22%) | NS |
| Baptise-Roberts 2012 (>85th) | Age 3: Mean (15) SD (11.7) | Age 3: Mean (724) SD (7.0) | 0.041 |
|  | Age 4: Mean (29) SD (21.2) | Age 4: Mean (1063) SD (9.0) | <0.001 |
|  | Age 7: Mean (90) SD (23.3) | Age 7: Mean (2795) SD (12.6) | <0.001 |
| Boerschmann 2010 (≥ 90th) | Pre-pregnancy BMI Overweight (BMI 25-29.9 kg/m2): 18/49 Pre-pregnancy BMI Obese (≥ BMI 30 kg/m2): 24/57 | 24/71 | NR |
| Chandler Laney 2012  (≥ 95th) | Normal weight: Mean (55.3) SEM (5.3) | Normal weight: Mean (49.1) SEM (4.0) | NS |
|  | Overweight: Mean (96.1) SEM (4.9) | Normal weight: Mean (94.2) SEM (6.2) | NS |
| Davis 2013 (≥85th) | Mean (97.3) SD (3.0) | Mean (97.3) SD (3.4) | NS |
| Gillman 2003(85th-95th) | Female: 35 (15.2%) | Female: 966 (13.1%) | NR |
|  | Male: 37 (19.5%) | Male: 951 (15.6%) | NR |
| Farfel 2013 (≥85th) | Female (15.9%) | Female (15.6%) | <0.01 |
|  | Male (27.0%) | Male (16.1%) | 0.01 |
| Koing 2014 (>50th) | Female 40 (67.8%) | Female: 17 (53%) | 0.18 |
| Hammound 2017 (based on International Obesity Task Force cut-offs) | 4/24 (17%) | T1D: 2/27 (7%) T2D: 8/22 (36%) | NR |
|  | Male: 20 (55.56%) | Male: 13 (50%) | 0.8 |
| Lee 2007 (≥ 95th) | 17 (8.5%) | 4 (4.3%) | NS |
| Le Moullec 2018 (based on International Obesity Task Force cut-offs) | 25.5 | 14.2 | <0.001 |
| Page 2014✝ (NR) | Mean (73.7) SEM (5) | Mean (52.5) SEM (6) | 0.61 |
| Page 2015✝ (NR) | Mean (63) SD (30) | Mean (61) SD (36) | 0.87 |
| Pham 2013 (>85th or >95th) | Mean (51.8) SD (33.1) | Mean (55.2) SD (30.6) | 0.12 |
| Rutwoska 2015 (>90th) | 54.80% | 29.00% | 0.04 |
| Tam 2008☨ (≥85th) | Mean (19) SEM (30.2) | Mean (26) SEM (25.5) | 0.86 |
| Tam 2017 (≥85th) | 30 (22.7%) | 121 (15.3%) | 0.03 |
| Wilk 2015 (≥85th) | 38% | 41% | 0.19 |
| Whitaker 1998 (≥85th) | 11/58 (19%) | 62/257 (24%) | NR |
| Wright 2009 (>95th obese,  >85th-95th overweight ) | Obese: 7 (14%) Overweight: 9 (18%) | Obese: 91 (9%) Overweight: 169 (17%) | NR |
| Zhao 2015Boys: Obese (⩾82nd) Overweight (⩾96.3)  Girls: Obese (⩾87.4) Obese (⩾98th) | Obese: 115 (10.7%)  Overweight: 178 (16.6%) | Obese: 212 (12.0%) Overweight: 222 (12.6%) | NR |
| BMI Z-Scores |  |  |  |
| Baptise-Roberts 2012 | Age 3: Mean (-0.51) SD (1.30) | Age 3: Mean (-1.29) SD (65.11) | 0.892 |
|  | Age 4 Mean (-0.13) SD (1.44) | Age 4: Mean (-0.42) SD (1.71) | 0.05 |
|  | Age 7: Mean (0.16) SD (1.16) | Age 7: Mean (-0.17) SD (1.16) | <0.001 |
| Lawlor 2010^ | Mean (0.302) SD (1.225) | Mean (-0.006) SD (0.991) | NR |
| Page 2012✝ | Mean (0.9) SD (0.4) | Mean (0.3) SD (0.4) | 0.04 |
| Page 2013✝ | Mean (0.7) SD (1) | Mean (0.4) SD (1) | 0.37 |
| Retnakaran 2013 | Median (0.28) IQR (-0.37- 0.75) | Median (-0.08) IQR (-0.58-0.55) | 0.2 |
| BMI SDS |  |  |  |
| Bozkurt 2016 | Mean (0.05) SD (1.1) | Mean (0.32) SD (1.0) | NR |
| BMI Peak |  |  |  |
| Hakanen 2016 | 417 (17.9) | 5688 (17.7) | NR |
| Total Cholesterol |  |  |  |
| Serum |  |  |  |
| Lee 2007 | Mean (4.4) SD (0.7) | IGT: Mean (4.2) SD (0.8) | NS |
| Tam 2008☨ | Mean (0.83) SD (0.48) | Mean (4.6) SD (0.8) | 0.62 |
| Vaarasmaki 2009 | Median (4.20) IQR (3.90–4.75) | Median (4.20) IQR (3.70–4.70) | NS |
| Tam 2017 Ω | Mean (4.52) 1-8SD (0.68) | Mean (4.47) SD (0.74) | 0.41 |
| LDL |  |  |  |
| Cord Blood |  |  |  |
| Elsamain 2013 *Ω* | Mean (2.3) SD (0.18) | Mean (2.6) SD (0.3) | 0.08 |
| Serum |  |  |  |
| Retnakaran 2013 | Median (2.60) IQR (2.15-3.15) | Median (2.60) IQR (2.30-3.20) | 0.58 |
| Tam 2008☨ | Mean (2.7) SD (0.8) | Mean (2.5) SD (0.8) | 0.08 |
| Tam 2017 Ω | Mean (2.53) SD (0.61) | Mean (2.47) SD (0.64) | 0.33 |
| Vaarasmaki 2009 | Median (2.20) IQR (2.00–2.70) | Median (2.20) IQR (1.90–2.60) | NS |
| HDL |  |  |  |
| Serum |  |  |  |
| Krishnaveni 2010☨ | Girls: Mean (1.0) SD (0.2) | Girls: Mean (1.1) SD (0.1) | 0.2 |
|  | Boys: Mean (1.2) SD (0.3) | Boys: Mean (1.1) SD (0.2) | 0.4 |
| Lee 2007 | Mean (1.4) SD (0.3) | IGT: Mean (1.4) SD (0.3) | NS |
| Retnakaran 2013 | Median (1.10) IQR (1.00-1.30) | Median (1.10) IQR (0.90-1.30) | 0.54 |
| Tam 2008☨ | Mean (1.58) SD (0.32) | Mean (1.71) SD (0.30) | 0.019 |
| Tam 2017 Ω | Mean (1.65) SD (0.31) | Mean (1.66) SD 0.35 | 0.73 |
| Vaarasmaki 2009 | Median (1.33) IQR (1.17–1.56) | Median (1.39) IQR (1.20–1.60) | NS |
| Triglycerides (mmol/L) |  |  |  |
| Serum |  |  |  |
| Krishnaveni 2010☨ | Girls: Mean (1.1) SD (0.5) | Girls: Mean (1.0) SD (0.4) | 0.2 |
|  | Boys: Mean (0.8) SD (0.3) | Boys: Mean (0.8) SD (0.3) | 0.6 |
| Lee 2007 | Mean (0.8) SD (0.3) | Mean (0.9) SD (0.4) | NS |
| Tam 2008☨ | Mean (0.83) SD (0.48) | Mean (0.92) Mean (0.4) | 0.27 |
| Tam 2017 Ω | Mean (0.78) SD (0.34) | Mean (0.74) SD (0.33) | 0.24 |
| Vaarasmaki 2009 | Median (0.79) IQR (0.63–0.97) | Median (0.72) IQR (0.57–0.96) | NS |
| Glucose |  |  |  |
| Cord blood |  |  |  |
| Lopez Morales 2016 | Mean (74.28) SD (12.58) | Mean (79.28) SD (7.68) | 0.04 |
| Serum |  |  |  |
| Borgono 2012 ∞ | Median (4.5) IQR (4.2–4.8) | Median (4.5) IQR (4.3–4.8) | 0.67 |
| Jaber 2006 | Diet: Mean (2.82) SD (0.92) | Control: Mean (4.03) SD (0.35) | <0.001 |
|  | Insulin: Mean (3.23) SD (1.00) |  | <0.05 |
| Krishnaveni 2005 *☨ | Mean (4.8) SD (0.5) | Mean (4.8) SD (0.5) | 0.8 |
| Krishnaveni 2010 *☨ | Girls: Mean (4.6) SD (0.4) | Girls: Mean (4.7) SD (0.4) | 0.7 |
|  | Boys: Mean (4.7) SD (0.4) | Boys: Mean (4.7) SD (0.4) | 0.6 |
| Lee 2007 | Mean (4.8) SD (0.5) | IGT: Mean (4.7) SD (0.5) | NS |
| Plagermann 1997 | Mean (4.90) SD (0.20) | PreGDM: Mean (4.57) SD (0.09) | NS |
| Page 2013*⁘* Ω | Mean (93) SEM (6) | Mean (86) SEM (5) | <0.001 |
| Retnakaran 2013 ∞ | Median (4.5) IQR (4.2-4.8) | Median (4.5) IQR (4.3-4.8) | 0.67 |
| Tam 2008☨ | Mean (4.7) SD (0.48) | Mean (4.7) SD (0.4) | 0.78 |
| Tam 2017 Ω | Mean (4.64) SD (0.49) | Mean (4.57) SD (0.35) | 0.12 |
| Vaarasmaki 2009 | Median (5.30) IQR (5.00–5.50) | Median (5.10) IQR (4.90–5.40) | NS |
| Vohr 1999 | LGA: 95 ± 11 | NR | NR |
|  | AGA: 96 ± 15 | NR | NR |
| Insulin |  |  |  |
| Cord blood |  |  |  |
| Jahan 2011 | Mean (21) IQR (2.6-67.0) | Mean (8.03) IQR (2.1-29.7) | NR |
| Serum |  |  |  |
| Borgono 2012 | Median (7.5) IQR (5.0–14.0) | Median (7.5) IQR (3.5–13.5) | 0.67 |
| Bozkurt 2016 | Median (4.1) IQR (2.1-5.9) | Median (3.15) IQR (1.0-4.7) | NR |
| Jaber 2006 | Diet: Mean (6.23) SD (5.98) | Mean (4.65) SD (4.72) | <0.05 |
|  | Insulin: Mean (7.84) SD (5.45) |  | <0.05 |
| Krishnaveni 2010 * | Girls: Median (35) IQR (25048) | Girls: Median (25) IQR (18-37) | 0.003 |
|  | Boys: Median (25) IQR (18-37) | Boys: Median (26) IQR (18-34) | 0.95 |
| Krishnaveni 2015 * | Median (54.3) IQR (37.0, 73.3) | Median (42.5) IQR (30.7, 53.2) | 0.02 |
| Lee 2007 | Mean (4.2) SD (1.1) | IGT: Mean (6.8) SD (3.5) | NS |
| Page 2013*⁘* Ω | Mean (10) SEM (7) | Mean (12) SEM (10) | 0.78 |
| Plagermann 1997 | Mean (64.2) SD (19.2) | PreGDM: Mean (118.3) SD (15.4) | <0.005 |
| Plagermann 1997 | Mean (40.3) SD (5.47) | PreGDM: Mean (78.1) SD (5.95) | <0.001 |
| Tam 2008☨ | Mean (66.4) SD (52.5) | Mean (64.7) SD (51.2) | 0.84 |
| Tam 2017 Ω | Mean (3.77) SD (3.57) | Mean (4.07) SD (5.33) | 0.53 |
| Vaarasmaki 2009 | Median (10.20) IQR (8.45–14.30) | Median (9.30) IQR (7.30–11.90) | NR |

| *^- Lawlor and Patel studies of same cohort* | NR - not reported for a direct comparison between GDM and non-GDM exposed offspring |
| --- | --- |
| **- Krishnaveni studies of same cohort* | NS - not significant |
| *⁘ - Page studies of the same cohort* |  |
| *☨ - the study with the oldest cohort was included in the meta-analysis* | |
| *# - sample size unknown for outcome* |  |

*Ω - adjusted values***∞ -** *Retnakaran study is a substudy of Borgono study*

**Supplementary table 2:** Quality assessment using the Newcastle-Ottawa Scale

| Quality assessment | Selection | | | | Comparability | Exposure | | | | Total Score | |
| --- | --- | --- | --- | --- | --- | --- | --- | --- | --- | --- | --- |
|  | **1** | **2** | **3** | **4** | **1** | **1** | **2** | **3** |  | |
| Baptise-Roberts | a | a | a | a | a | a | a | b | 7 | |
| Boney | a | b | b | a | a | a | b | b | 3 | |
| Borgono | a | a | a | a | a | a | a | c | 7 | |
| Bozkurt | a | a | b | a | a | a | a | a | 7 | |
| Boerschermann | a | a | c | b | a | a | a | c | 5 | |
| Buzinaro | a | a | c | b | a | a | a | b | 5 | |
| Catalano | a | a | a | a | a | a | a | a | 8 | |
| Chandler-Laney | b | b | c | b | b | d | a | c | 1 | |
| Chang | a | a | a | a | a | a | a | c | 6 | |
| Clausen | a | a | a | a | a | a | a | b | 7 | |
| Davis | b | b | a | b | not adjusted | d | a | a | 3 | |
| Elsamian | a | a | b | a | a | a | a | a | 7 | |
| Farfel | a | a | a | a | a | a | a | a | 7 | |
| Gilliman | b | a | c | a | a+b | d | a | c | 4 | |
| Hakanen | a | b | b | a | a | a | a | a | 5 | |
| Holder | b | b | a | a | a | d | a | a | 5 | |
| Jaber | a | a | a | a | a | a | a | a | 8 | |
| Jahan | a | a | a | a | a+b | a | a | a | 8 | |
| Kavesa | a | a | a | a | a | a | a | b | 7 | |
| Kearney | a | b | a | a | a | a | a | c | 6 | |
| Koing | a | b | a | a | a | a | a | a | 7 | |
| Krishnaveni (2005) | a | a | a | a | a | a | a | b | 7 | |
| Krishnaveni (2010) | a | a | a | a | a | a | a | c | 7 | |
| Krishnaveni (2015) | a | a | a | a | a | a | a | b | 7 | |
| Lawlor | a | a | a | a | a | a | a | c | 7 | |
| Lee | a | a | c | a | a | a | a | b | 6 | |
| Le Moullec | a | b | b | a | a | a | a | b | 5 | |
| Li | b | a | c | a | a+b | d | a | c | b | |
| Lopes-Morales | a | a | a | a | a+b | a | a | a | 8 | |
| Mietten | a | a | a | a | a | a | a | b | 7 | |
| Nehring | a | b | a | b | a | a | a | a | 5 | |
| Nielsen | a | a | b | a | a | a | a | c | 6 | |
| Page 2012 | a | a | c | a | not adjusted | d | a | c | 3 | |
| Page 2013 | a | a | c | a | not adjusted | d | a | c | 3 | |
| Page 2014 | a | a | c | a | not adjusted | d | a | c | 3 | |
| Page 2015 | a | a | c | a | not adjusted | d | a | c | 3 | |
| Patel | a | a | a | a | a | a | a | b | 7 | |
| Pham | a | a | a | a | not adjusted | a | a | c | 6 | |
| Pirkola (2008) | a | a | b | a | a | a | a | b | 6 | |
| Piroka (2010) | a | b | a | a | a | a | a | b | 6 | |
| Plagemann 1997 | a | b | a | a | a | a | a | c | 6 | |
| Plagemann 1997 | a | b | a | a | a | a | a | c | 6 | |
| Retnakaran | a | a | a | a | a | a | a | c | 6 | |
| Rutowska | c | b | c | a | not known | e | b | a | 2 | |
| Silverman | c | b | c | a | a | e | ? | c | 2 | |
| Tam (2008) | a | a | a | a | a | a | a | c | 7 | |
| Tam (2010) | a | a | a | a | a | a | a | c | 7 | |
| Tam (2017) | a | a | a | a | a | a | a | b | 7 | |
| Teng | a | a | a | b | not adjusted | a | a | c | 5 | |
| Tsadok | a | b | a | a | a | a | a | c | 6 | |
| Vaarsamarki | a | a | a | a | a | a | a | c | 7 | |
| Vohr 1995 | a | a | a | a | not adjusted | a | a | a | 6 | |
| Vohr 1999 | a | a | a | a | not adjusted | a | a | c | 6 | |
| Whitaker | a | a | a | a | a | a | a | b | 6 | |
| Wang 2018 | a | a | a | a | a | a | a | a | 8 | |
| Wilk | a | a | a | a | not adjusted | a | a | a | 7 | |
| Wright | a | a | a | a | a | a | a | b | 7 | |
| Zhao | a | a | a | b | a | a | a | b | 6 | |
| Zhao (2016) | a | b | a | b | not adjusted | a | a | b | 4 | |

**1:**


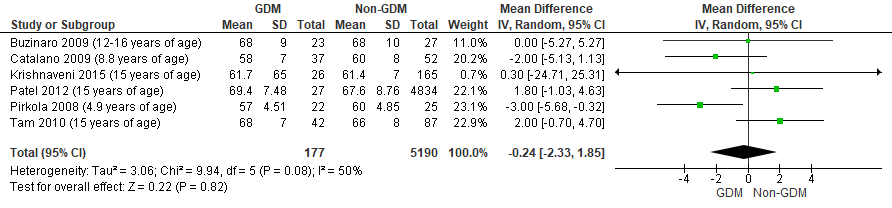


**Supplementary Figure 1:** Mean difference in diastolic blood pressure (mm Hg) in those exposed to GDM *in utero* and controls

**Supplementary Table 3**: Sensitivity analysis for **BMI Z-Score**

| **Analysis** | **Studies** | **N=** | **SMD** | **95% CI** | **Chi2 P=** | **I2 (%)** |
| --- | --- | --- | --- | --- | --- | --- |
| Normal | 9 | 31,485 | 0.11 | 0.02,0.20 | 0.15 | 34 |
| Sensitivity | 8 | 31,275 | 0.13 | 0.01,0.25 | 0.10 | 42 |

**
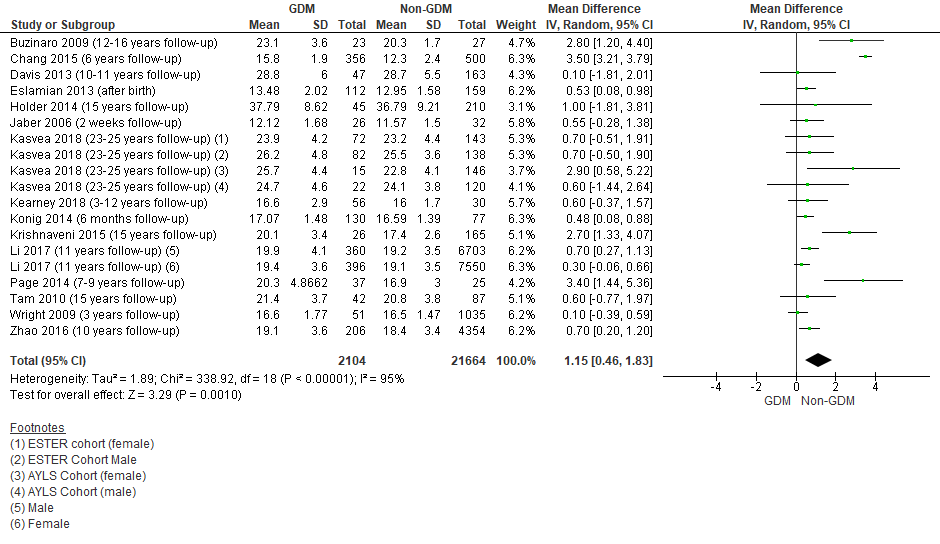
**

**Supplementary Figure 2:** Mean difference in BMI (kg/m2) in those exposed to GDM *in utero* and controls

**Supplementary Table 4**: Sensitivity analysis for BMI (kg/m2)

| **Analysis** | **Studies** | **N=** | **SMD** | **95% CI** | **Chi2 P=** | **I2 (%)** |
| --- | --- | --- | --- | --- | --- | --- |
| Normal | 16 | 23,768 | 1.15 | 0.46,1.83 | <0.00001 | 95 |
| Sensitivity | 15 | 23,654 | 1.10 | 0.42, 1.78 | <0.00001 | 95 |

**
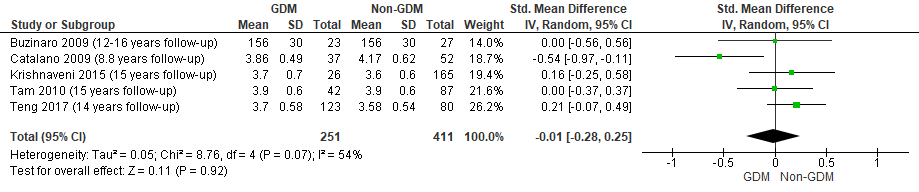
3A:**

**3B:**


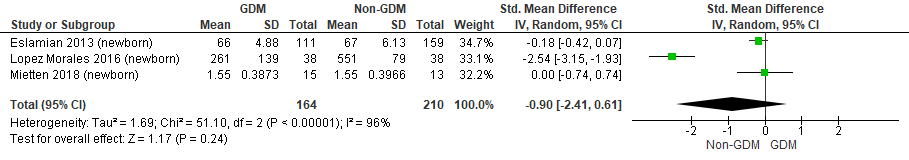


**Supplementary Figure 3: (A)** Standard mean difference in serum blood total cholesterol in those exposed to GDM *in utero* and controls **(B)** Standard mean difference in cord blood total cholesterol in those exposed to GDM *in utero* and controls

**4A:**


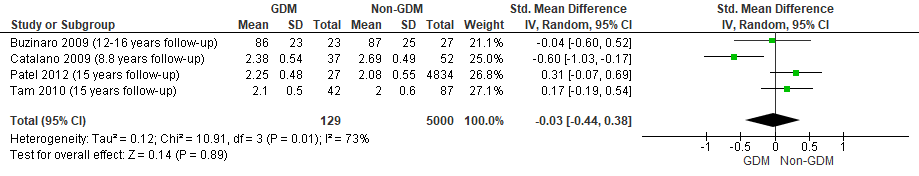


**4B:**

**
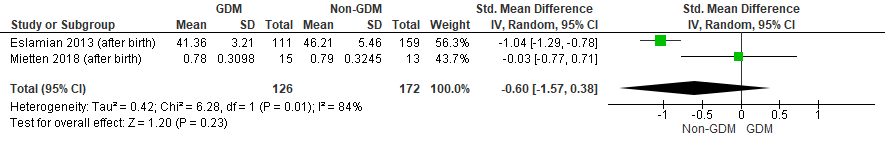
Supplementary Figure 4: (A)** Standard mean difference in serum LDL cholesterol in those exposed to GDM *in utero* and controls **(B)** Standard mean difference in cord blood LDL cholesterol in those exposed to GDM *in utero* and control

**5A:**

**
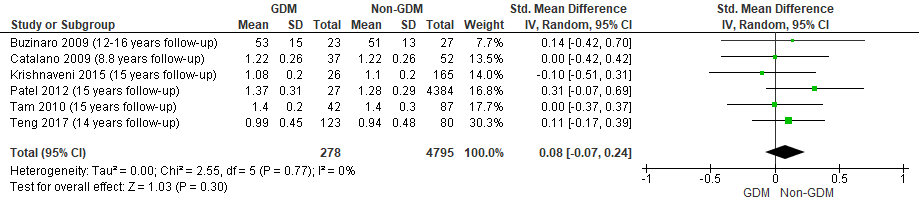
**

**5B:**

**
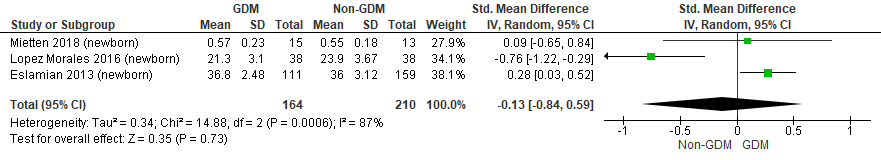
**

**Supplementary Figure 5: (A)** Standard mean difference in serum blood HDL cholesterol in those exposed to GDM *in utero* and controls (**B)** Standard mean difference in cord blood HDL cholesterol in those exposed to GDM *in utero* and controls

**6A:**


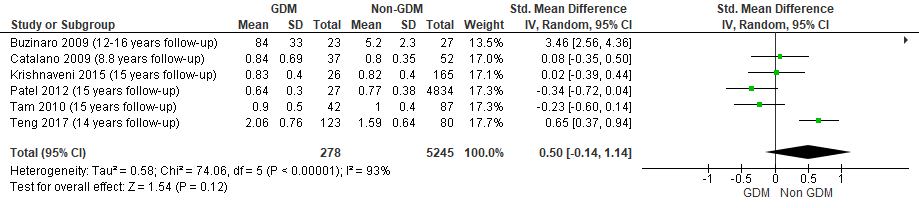


**6B:**

**
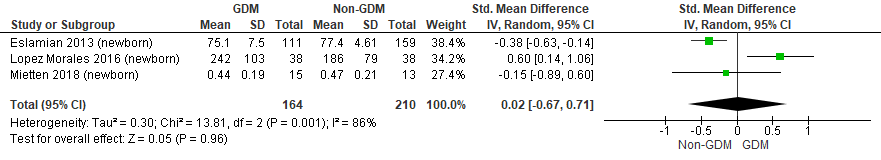
**

**Supplementary Figure 6: (A)** Standard mean difference in serum triglycerides in those exposed to GDM *in utero* and controls **(B)** Standard mean difference in cord blood triglycerides in those exposed to GDM *in utero* and controls

**7A:**

**
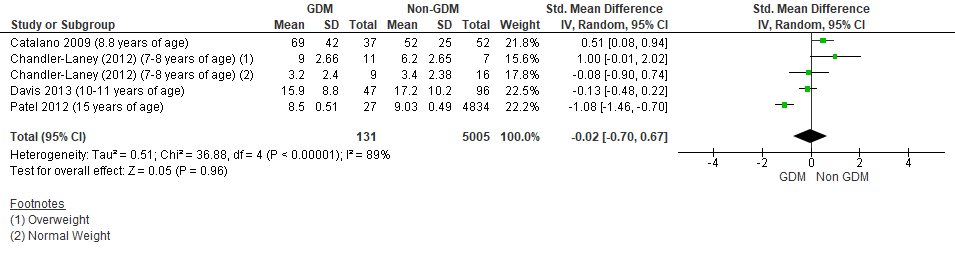
**

**7B:**

**
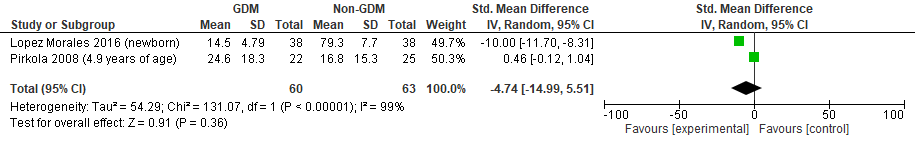
**

**Supplementary Figure 7: (A)** Standard mean difference in serum insulin in those exposed to GDM *in utero* and controls  **(B)** Standard mean difference in cord blood insulin in those exposed to GDM *in utero* and controls

Supplementary Table 5: Sensitivity analysis for **serum insulin**

| **Analysis** | **Studies** | **N=** | **SMD** | **95% CI** | **Chi2 P=** | **I2 (%)** |
| --- | --- | --- | --- | --- | --- | --- |
| Normal | 4 | 5136 | -0.02 | -0.70,0.67 | <0.00001 | 89 |
| Sensitivity | 3 | 5093 | -0.24 | -1.11,0.63 | <0.00001 | 94 |

Supplementary Table 6: Sensitivity analysis for **serum glucose**

| **Analysis** | **Studies** | **N=** | **SMD** | **95% CI** | **Chi2 P=** | **I2 (%)** |
| --- | --- | --- | --- | --- | --- | --- |
| Normal | 11 | 6,423 | 0.43 | 0.08,0.77 | <0.00001 | 89 |
| Sensitivity | 9 | 6,380 | 0.47 | 0.09,0.84 | <0.00001 | 91 |


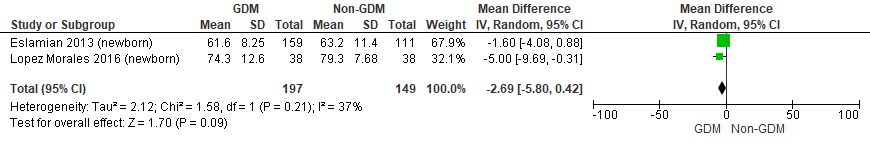


**Supplementary Figure 8:** Standard mean difference in cord blood glucose in those exposed to GDM *in utero* and controls


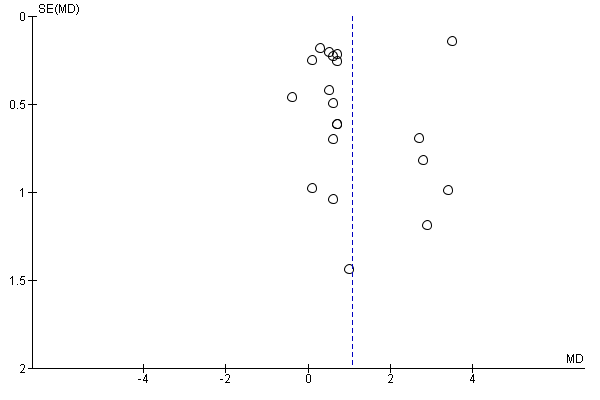
2 (A)

**
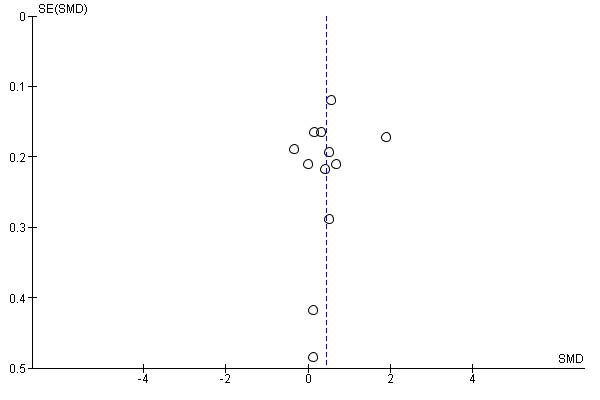
**

(B)

**Supplementary Figure 9**: Funnel plot of studies for all outcomes: (A) BMI (B) Fasting glucose
